Perl et al.

1                                   **A thalamic circuit represents dose-like responses induced**  
2                                   **by nicotine-related beliefs in human smokers**

3  
4 **Authors:** Ofer Perl<sup>1,2,3</sup>, Anastasia Shuster<sup>1,2</sup>, Matthew Heflin<sup>1,2</sup>, Soojung Na<sup>1,2</sup>, Ambereen  
5 Kidwai<sup>4</sup>, Natalie Booker<sup>5</sup>, William C. Putnam<sup>5</sup>, Vincenzo G. Fiore<sup>1,2</sup>, Xiaosi Gu<sup>1,2,3\*</sup>

6  
7 **Affiliations:**

8 <sup>1</sup>Center for Computational Psychiatry, Icahn School of Medicine at Mount Sinai; New York,  
9 NY, 10029, USA

10  
11 <sup>2</sup>Department of Psychiatry, Icahn School of Medicine at Mount Sinai; New York, NY 10029,  
12 USA,

13  
14 <sup>3</sup>Nash Family Department of Neuroscience, Icahn School of Medicine at Mount Sinai; New  
15 York, NY, 10029, USA

16  
17 <sup>4</sup>School of Behavioral and Brain Sciences, University of Texas at Dallas; Dallas, TX, 75080,  
18 USA

19  
20 <sup>5</sup>Department of Pharmacy Practice, Jerry H. Hodge School of Pharmacy; Texas Tech University  
21 Health Sciences Center, Dallas, TX, 75235, USA

22  
23 \*Correspondence:

24 Xiaosi Gu (X.G) [xiaosi.gu@mssm.edu](mailto:xiaosi.gu@mssm.edu).

25  
26 **Abstract**

27 Could non-pharmacological constructs, such as beliefs, impact brain activities in a dose-  
28 dependent manner as drugs do? While beliefs shape many aspects of our behavior and wellbeing,  
29 the precise mapping between subjective beliefs and neural substrates remains elusive. Here,  
30 nicotine-addicted humans were instructed to think that an electronic cigarette (e-cigarette)  
31 contained either “low”, “medium”, or “high” levels of nicotine, while nicotine content was kept  
32 constant. After vaping the e-cigarette, participants performed a decision-making task known to  
33 engage neural circuits affected by nicotine while being scanned by fMRI. Activity in the  
34 thalamus, a key binding site for nicotine, increased parametrically according to belief dosage.  
35 Furthermore, the functional coupling between thalamus and ventromedial prefrontal cortex, a  
36 region implicated in value and state representations, also scaled to belief dosage. These findings  
37 illustrate a dose-dependent relationship between a thalamic circuit and nicotine-related beliefs in  
38 humans, a mechanism previously known to only apply to pharmacological agents.

Perl et al.

40 **Key words:** nicotine, addiction, beliefs, dose, electronic cigarettes, functional MRI (fMRI),  
41 thalamus, striatum, vmPFC, state representation

Perl et al.

## 42 **Introduction**

43 Humans hold beliefs that can profoundly alter our behaviors and wellbeing. Albeit subjective in  
44 nature, beliefs – similar to other mental functions – are represented by biological substrates in the  
45 brain<sup>1,2</sup>. However, the exact mapping between subjective beliefs and neurobiological substrates  
46 remains largely unknown, hindering our understanding of neuropsychiatric conditions like drug  
47 addiction, where purely biochemical explanations are not sufficient to account for the complexity  
48 of the disorder<sup>3,4</sup>. Elucidating the precise neural mechanisms of beliefs is also important for  
49 understanding how beliefs and expectations play a role in pharmacological treatments, where  
50 individuals' drug response differ drastically<sup>5</sup>.

51  
52 The placebo effect represents a notable example supporting the potential interaction between  
53 beliefs and neurobiology. In these observations, one's symptoms can improve simply due to  
54 positive beliefs about a receiving a treatment while there is no active ingredient in the drug<sup>5-9</sup>.  
55 Even in the presence of a powerful neuroactive substance such as nicotine, beliefs can exert a  
56 binary all-or-none type of effect on neural responses in human smokers. Collectively, these  
57 findings provide initial support for the notion that beliefs can broadly affect neurobiological  
58 activities in the human brain<sup>10,11</sup> without evidence for how precise the neural effect of beliefs  
59 might be.

60  
61 To establish precision, pharmacological research has typically relied on the concept of dose-  
62 dependent response, where the amount of active ingredients in a drug is known to modulate  
63 biological processes proportionally. In terms of neuropharmacology, dose responses in the brain  
64 have been observed in a wide range of neuroactive drugs such as nicotine<sup>12</sup>, alcohol<sup>13</sup>, and  
65 marijuana<sup>14</sup>. However, such inquiry has rarely existed in neuroscience research on human  
66 beliefs. Is it possible that beliefs – a highly subjective and implicit mental construct – could  
67 modulate neurophysiological responses in a similar dose-dependent manner?

68  
69 Based on the literature reviewed thus far, we hypothesized that human beliefs – such as those  
70 related to neuroactive substances like nicotine – can modulate brain activities in a manner that is  
71 similar to pharmacologically induced dose responses. Nicotine is known to broadly affect  
72 distributed regions in the brain, including the thalamus and the striatum<sup>15,16</sup>, both of which are  
73 important for cognition and decision-making<sup>17,18</sup>. The thalamus in particular, contains one of the  
74 highest densities of nicotinic acetylcholine receptors (nAChRs) for nicotine binding in the human  
75 brain<sup>19,20</sup>. The stimulation of nAChRs by nicotine can lead to subsequent dopamine release in  
76 mesolimbic structures such as the ventral striatum<sup>15,21</sup>. In humans, however, high levels of  
77 nicotine are not a necessary condition for the activation of nAChRs. For instance, positron  
78 emission tomography (PET) imaging studies have demonstrated that there can be a substantial  
79 degree of occupancy of nAChRs even when nicotine-addicted individuals only smoked  
80 denicotinized or low-nicotine content cigarettes<sup>22,23</sup>, or only had second-hand smoke<sup>24</sup>. These  
81 findings pinpoint to the possibility that nicotine itself was not sufficient to account for the

Perl et al.

82 complex neural effects observed in nicotine-dependent humans, and that cognitive constructs  
83 such as nicotine-related beliefs may play a crucial role in modulating addiction neurobiology.

84

85 To test this hypothesis, we instructed nicotine-dependent human smokers to believe that an  
86 electronic cigarette (e-cigarette) they were about to vape contained either “low”, “medium”, or  
87 “high” levels of nicotine, while the actual nicotine content was fixed across all e-cigarettes (see  
88 **Materials and Methods** for details). After vaping, smokers (final sample included 60 scans  
89 across 20 smokers) performed a monetary decision-making task during functional magnetic  
90 resonance imaging (fMRI; **Fig. 1a**). A group of non-smoking healthy controls (HCs, n=31) also  
91 performed the same fMRI task, but without going through the vaping procedure. We chose to use  
92 e-cigarettes to deliver nicotine as nicotine strength can be controlled much more precisely  
93 compared to traditional cigarettes. Based on the literature reviewed thus far, we predicted that the  
94 activity in those neural regions characterized by high nAChRs (i.e. thalamus and related  
95 structures) might represent beliefs about nicotine dose in a precise manner, resembling the dose-  
96 dependent responses found in pharmacological studies. If proven true, such a finding would  
97 reveal a higher degree of sophistication and precision of the mapping between human beliefs and  
98 brain states than previously understood.

99

## 100 **Results**

### 101 *Instructions induced changes in subjective beliefs in smokers, but did not affect overall* 102 *nicotine intake, metabolism, or baseline saturation*

103 Our key experimental manipulation is the instruction given to the participants about whether the  
104 e-cigarette had “low”, “medium”, or “high” strength of nicotine. To examine if this design  
105 indeed induced changes in beliefs about nicotine in our subjects, we asked all participants to rate  
106 their perceived nicotine strength using a 10-point scale after vaping. Overall, participants’  
107 perceived nicotine strength significantly increased as a function of instructed beliefs about  
108 nicotine dosage (mean  $\pm$  SD (AU); ‘low’: =  $3.52 \pm 0.61$ , ‘medium’: =  $4.52 \pm 0.41$ , ‘high’: =  $5.82$   
109  $\pm 0.47$ , rmANOVA  $F(2,38) = 9.71$ ,  $P = 0.0004$ , partial  $\eta^2 = 0.34$ , 90%  
110 CI =  $0.12 \leq \eta^2 \leq 0.48$ , **Fig. 1b**), supporting the validity of our experimental manipulation.

111

112 Next, we took extensive sanity checks to ensure the instruction did not interfere with  
113 participants’ nicotine intake, metabolism, or their baseline nicotine saturation levels. First,  
114 participants might vape less in “weaker” nicotine conditions due to a lack of interest. To control  
115 for this, we set vaping time to 20 minutes during data collection. Importantly, we also quantified  
116 the amount of nicotine intake, which equals the change in cartridge weight after vaping  
117 multiplied by the actual percentage of nicotine content (1.2%). We found that nicotine intake did  
118 not differ across belief conditions (nicotine intake (mg): ‘low’: =  $0.928 \pm 0.56$ , ‘medium’: =  
119  $0.719 \pm 0.423$ , ‘high’: =  $0.783 \pm 0.434$ ; rmANOVA  $F(2,38) = 1.806$ ,  $P = 0.178$ ; **Fig. 1c**),  
120 suggesting that difference in belief about nicotine did not affect how much liquid or nicotine was

Perl et al.

121 consumed by the smokers. The overall amount of consumed nicotine here is in a range that is  
122 similar to nicotine delivered by traditional cigarettes in previous experimental studies<sup>10,11,23</sup>.

123  
124 However, it might be possible that even with the same nicotine consumption, nicotine  
125 metabolism might still differ between belief conditions. To address this, we collected saliva  
126 samples both before and after vaping for high-performance liquid chromatography tandem mass  
127 spectrometry (LC-MS/MS) analytical quantification of cotinine—a nicotine metabolite indicative  
128 of plasma nicotine levels<sup>25</sup> (see **Materials and Methods** for details). We found that vaping-  
129 induced changes in cotinine concentrations (ng/mL) were comparable across conditions  
130 (rmANOVA  $F(2,32) = 0.959, P = 0.393$ ; **Fig. 1d**), suggesting that nicotine metabolism itself was  
131 unlikely a factor contributing to any brain-based differences.

132  
133 We also measured exhaled carbon monoxide (CO) before vaping as an index of participants’  
134 baseline nicotine saturation level. We did not observe differences in CO levels across conditions  
135 (parts per million (ppm); rmANOVA  $F(2,32) = 0.364, P = 0.698$ ; **Fig. 1e**). Taken together, these  
136 analyses confirmed that our instruction successfully influenced participants’ beliefs about  
137 nicotine strength, while mitigating the concern that imbalanced nicotine consumption,  
138 metabolism, or baseline deprivation might have contributed to any neural differences across  
139 conditions.

140  
141 ***Thalamic representation of dose-like responses induced by nicotine-related beliefs***

142 Our main quest here is how beliefs about nicotine are represented by neural activities in smokers.  
143 We chose to measure neural activities during a value-based decision-making task because both  
144 nicotine and belief about nicotine have been shown to influence similar circuitries involved in  
145 reward processing<sup>10,11,26,27</sup>. Specifically, we used a sequential investment task (see **Materials**  
146 **and Methods** for details) to probe reward processing; similar paradigms have been previously  
147 used in both healthy controls and those with nicotine addiction<sup>10,11,26,27</sup>. Briefly, participants  
148 made a series of choices regarding how to invest (or short-sell) in simulated stock markets, based  
149 on one’s prediction of market return  $r_t$ , defined as  $r_t = (p_t - p_{t-1}) / p_{t-1}$  (where  $p_t$  denotes the  
150 market price at time  $t$ ). Because subjects were allowed to place either positive or negative bets,  
151 they could win (or lose) money in either positive or negative markets. As such, the absolute  
152 value  $|r|$  represents the actual reward value that is attainable to the subject.

153  
154 In a whole-brain ANOVA with belief as the main factor (“low”, “medium”, or “high”) and the  
155 value signal  $|r|$  as the key parametric modulator (see **Materials and Methods** for details), we  
156 observed that value-related neural activities in the thalamus exhibited a dose-dependent response  
157 to instructed beliefs about nicotine strength (peak at MNI:  $x = -15, y = -19, z = -1; P < 0.05$ ,  
158 FWE (family-wise error) cluster-corrected at a cluster-defining threshold of  $P < 0.005$ ,  
159 uncorrected,  $k = 50, P = 0.006$ ; **Fig. 2a**). No other brain structures showed a similar neural  
160 activity pattern in relation to beliefs at the whole brain level with the same statistical threshold.

Perl et al.

161 Whole brain-level statistical maps of each belief condition are available in **Supplementary Fig.**  
162 **1).**

163  
164 A region of interest (ROI) analysis using an independent anatomical mask<sup>28</sup> further confirmed  
165 that BOLD signals from the thalamus differentiated between instructed belief conditions (mean  $\pm$   
166 SD (AU); ‘low’: =  $0.157 \pm 1.047$ , ‘medium’: =  $0.601 \pm 0.714$ , ‘high’: =  $2.914 \pm 0.865$ ;  
167 rmANOVA test  $F(2,38) = 3.62$ ,  $P = 0.036$ , partial  $\eta^2 = 0.16$ , 90%  
168 CI =  $0.0057 \leq \eta^2 \leq 0.30$ , **Fig. 2b**). These activations did not differ significantly from non-  
169 smoking health controls (n=31 for HCs; see **Materials and Methods** for details; mean  $\pm$  SD  
170 (AU) for HC: =  $2.318 \pm 4.258$ ; two-sample t-test: ‘smokers-low’ vs ‘HC’  $t(49) = 1.95$ ,  $p = 0.057$ ;  
171 ‘smokers-medium’ vs ‘HC’  $t(49) = 1.53$ ,  $p = 0.132$ ; ‘smokers-high’ vs ‘HC’  $t(49) = -0.50$ ,  $p =$   
172  $0.616$ ).

173  
174 We also carried out a non-parametric approach to examine if the relationship we observed  
175 between beliefs and neural activities was indeed not random. Using a permutation analysis  
176 approach, we iteratively extracted beta estimates from surrogate GLMs based on shuffled belief  
177 conditions ( $N = 2,000$ ). We observed that beta estimates for the actual allocation of belief  
178 conditions ranked significantly higher than the surrogate distribution ( $P = 0.002$ , **Fig. 2c**). A finer  
179 parcellation of the thalamus<sup>29</sup> revealed that ventral posterior nuclei – notably the centromedian  
180 (CM) and lateral geniculate nuclei (LGN), were the primary nuclei in which reward-tracking  
181 neural activity differentiated between instructed beliefs in a parametric manner (FDR corrected  
182 at  $q = 0.05$ ; VPL, Pulvinar, LGN, CM all  $P < 0.05$ ; see **Supplementary Information** and  
183 **Supplementary Fig. 2**).

184  
185 Next, we asked whether thalamic activities were actually predictive of the belief condition using  
186 a decoding analysis. We trained a regularized linear discriminant analysis (rLDA) model to  
187 decode instructed belief conditions from multivoxel spatial patterns extracted from the  
188 thalamus<sup>30,31</sup>. We were able to decode at 49.3 % accuracy the instructed belief condition from the  
189 distributed multivoxel patterns of thalamic activity. This decoding accuracy was significantly  
190 greater than chance level (33.3 %), as confirmed by a permutation test where we iterated the  
191 procedure with shuffled labels ( $N = 10,000$ ) and compared the true decoding accuracy to the  
192 surrogate accuracy distribution (surrogate:  $33.1 \pm 6.3$  %,  $P = 0.011$ , **Fig. 2d**). We further applied  
193 this decoding approach to each nucleus within the thalamus, using the same anatomical  
194 parcellation as before. We observed that decoding accuracy was roughly aligned with the spatial  
195 distribution of effects uncovered in the GLM analysis in that there was greater decoding  
196 accuracy in the ventral posterior nuclei. Following FDR correction only the posterolateral  
197 nucleus (VPL) nucleus showed decoding ability significantly higher than chance (FDR corrected  
198 at  $q = 0.05$ ; VPL,  $P = 0.018$ ; see **Supplementary Fig. 4**).

199



Perl et al.

200 Given the individual variability in susceptibility to instructed beliefs<sup>10,11</sup>, we also asked whether  
201 participants' subjective beliefs, indexed by their self-reported perception about nicotine strength,  
202 also parametrically modulated thalamic responses. We found that across all participants and all  
203 sessions, subjective ratings of perceived nicotine strength correlated with reward-related  
204 activities in the thalamus (Spearman correlation,  $r = 0.27$ ,  $P = 0.035$ , **Fig. 2e**), suggesting that  
205 these neural signals were linked to participants' perceptions about nicotine strength following  
206 instructed beliefs. Taken together, these analyses further confirmed that experimental  
207 instructions about nicotine strength shaped subjective perception in smokers and induced dose-  
208 dependent neural responses in the thalamus, a brain region with one of the highest concentrations  
209 of nicotinic acetylcholine receptors and a main binding site for nicotine<sup>19,32</sup>.

210  
211 Taken together, these results pinpoint to the thalamus – in particular the posterior thalamus - as a  
212 key neural substrate representing nicotine-related beliefs. This finding might provide a  
213 mechanistic account for the previously observed effects that smoking denicotinized or low-  
214 nicotine content cigarettes can still induce a substantial level of nAChR occupancy in the human  
215 brain<sup>22-24</sup>.

216  
217 ***Observed effect of beliefs on thalamic activity was not due to sensorimotor effects or spatial***  
218 ***smoothing***

219 Next, we conducted several control analyses to rule out alternative explanations of observed  
220 thalamic effects. In addition to its involvement in nicotine addiction, the thalamus - especially  
221 the thalamic nuclei identified so far - is also known for encoding basic sensorimotor information.  
222 Thus, it is possible that the differential neural states in the thalamus were induced by different  
223 levels of visual or motor processing for the three conditions, instead of the belief per se. To rule  
224 out this possibility, we first checked button pressing behavior during the task, and found no  
225 difference between belief conditions (see **Supplementary Information**). We also examined  
226 neural responses related to button presses (motor) and simple viewing of market (visual) by  
227 constructing separate GLMs to model the fMRI data. We found no difference in thalamic activity  
228 related to motor or visual processing between belief conditions (**Supplementary Fig. 3a**).

229  
230 Given that technical choices during fMRI preprocessing such as spatial smoothing could have an  
231 impact on the resulting findings<sup>33</sup>, we also conducted all of our main analyses again by using a  
232 preprocessing pipeline without spatial smoothing (see Materials and Methods for details). We  
233 confirmed that the identified belief representation in thalamus was not due to spatial smoothing  
234 (**Supplementary Fig. 3b**). Taken together, these additional analyses ruled out several important  
235 confounds and suggest that it is unlikely that visual or sensorimotor elements contributed to the  
236 observed mapping between belief conditions and thalamic activity.

237  
238 ***Striatal activity tracked reward value, but did not distinguish between belief conditions***

Perl et al.

239 Thus far, our primary finding related on the key belief effect centered around the thalamus.  
240 However, previous work<sup>10</sup> has also identified the ventral striatum as a key region that could be  
241 modulated by belief about nicotine. The ventral striatum, a mesolimbic region receiving  
242 dopaminergic inputs from the ventral tegmental area (VTA), is known to encode reward signals  
243 and also affected by nicotine addiction. Thus, we conducted a separate set of analyses focused on  
244 the ventral striatum. Consistent with previous findings, we found that the ventral striatum tracked  
245 the market value signal  $|r_t|$  across all conditions ( $P_{FDR} q < 0.01$ , **Fig. 3a**). However, striatal  
246 responses did not differ between belief conditions at the whole brain level in an ANOVA  
247 analysis ( $P > 0.05$ , **Supplementary Fig. 5a**).  
248

249 An ROI analysis using an independent mask of the nucleus accumbens (NAcc) further confirmed  
250 that neural activities in the NAcc did not differentiate between belief conditions (rmANOVA  
251  $F(2,38) = 0.056$ ,  $P = 0.945$ , permutation test:  $P = 0.94$ ; **Fig. 3b**). These parameter estimates  
252 were also comparable to those extracted from the same group of healthy controls using the same  
253 NAcc mask (smokers: ‘low’:  $= 1.228 \pm 3.329$ , ‘medium’  $= 1.248 \pm 2.828$  ‘high’:  $= 1.016 \pm$   
254  $2.6983$ , ‘HC’:  $= 1.781 \pm 2.138$ ; two-sample t-test: ‘low’ vs ‘HC’  $t(49) = -0.740$ ,  $p = 0.462$ ;  
255 ‘medium’ vs ‘HC’  $t(49) = -0.784$ ,  $p = 0.436$ ; ‘high’ vs ‘HC’  $t(49) = -1.138$ ,  $p = 0.261$ ).  
256

257 In line with the GLM results, classification accuracy for belief condition using patterns extracted  
258 from the NAcc was not significantly higher than chance (ground truth = 34.0 %, surrogate:  $32.1$   
259  $\pm 6.3$  %,  $P = 0.372$ ; **Fig. 3c**). Finally, we examined reward-related activations in other basal  
260 ganglia nuclei, namely the putamen and the caudate nucleus. We did not find significant  
261 differences between belief conditions either in separate ROI analyses (putamen rmANOVA  
262  $F(2,38) = 1.15$ ,  $P = 0.327$ ; caudate rmANOVA  $F(2,38) = 0.24$ ,  $P = 0.781$ ; **Supplementary Fig.**  
263 **5b-c**).  
264

265 Seemingly surprising at a first glance, the lack of belief effects on the striatum was consistent  
266 with the lack of belief effect of instructed beliefs on reinforcement learning behavior in smokers  
267 in this study (see **Supplementary Information** and **Supplementary Fig. 6** and **Supplementary**  
268 **Table 1** for details). Combined with the main belief effect concerning the thalamus, we speculate  
269 that the experimentally manipulated beliefs in this study primarily modulated low-level  
270 information gating as opposed to high-level value-guided decision-making in the previous  
271 study<sup>10</sup>. This difference might be attributed to the fact that smokers were not familiar with e-  
272 cigarettes in the current study and thus were not driven by conditioned responses tied to using a  
273 traditional cigarette as is the case for previous work<sup>10</sup>. We will discuss this in more detail later.  
274

### 275 *Belief about nicotine modulated functional connectivity between prefrontal cortex and* 276 *thalamus in a dose-dependent manner*

277 At the circuit level, the thalamus is heavily connected to various cortical regions and is known to  
278 contribute to higher-order cognition via these connections<sup>34</sup>. Thus, we hypothesized that belief



Perl et al.

279 might also modulate the functional connectivity between the thalamus and higher cortical regions  
280 such as prefrontal regions. Specifically, the ventromedial prefrontal cortex (vmPFC) has been  
281 increasingly recognized as a key region in representing task states<sup>35,36</sup> and the structure of  
282 abstract knowledge. Anatomically, it is well known that the thalamus and vmPFC are densely  
283 connected<sup>37,38</sup>. Thus, we predicted that thalamic-vmPFC coupling would differ between belief  
284 conditions in our study.

285

286 To this end, we carried out a psychophysiological interaction (PPI; see **Materials and Methods**)  
287 analysis<sup>39</sup> with the thalamus as a seed region to investigate how beliefs about nicotine were  
288 represented at a neural circuitry level. We found that belief about nicotine indeed modulated  
289 functional connectivity between the thalamus and the vmPFC both at the whole brain level ( $P_{SVC}$   
290  $< 0.05$ , FWE cluster-corrected at a cluster-defining threshold of  $P < 0.005$ , uncorrected,  $P =$   
291  $0.041$ ; **Fig. 3a**) and via an ROI analysis using a vmPFC mask from an independent study  
292 involving belief formation<sup>40</sup> (peak at MNI  $x = -11$ ,  $y = 50$ ,  $z = -6$ ,  $k = 5$ ; **Supplementary Fig. 7a**;  
293 **Fig. 3b**). In sharp contrast, a separate set of PPI analyses using the ventral striatum as a seed  
294 region did not yield any significant changes in functional connectivity with the vmPFC or any  
295 other brain region at the same threshold (**Supplementary Fig. 7b**). The vmPFC is a brain region  
296 heavily implicated in the computation of value and belief updating<sup>36</sup>. Importantly, recent work  
297 has pinpointed to the vmPFC for its representation of task states<sup>41</sup>. Thus, this result suggests that  
298 in addition to modulating thalamic activation itself, belief about nicotine also parametrically  
299 scaled circuit-level interactions between the thalamus and a prefrontal region involved in higher-  
300 level cognition and decision-making.

301

## 302 **Discussion**

303 How are drug-related beliefs represented in the human brain? Using nicotine as a test case, we  
304 demonstrated that verbal instruction regarding nicotine strength (“low”, “medium”, or “high”)  
305 modulated how human smokers perceived the strength of nicotine contained in an e-cigarette that  
306 they vaped. Importantly, beliefs about nicotine strength were represented by neural activities in  
307 the thalamus in a dose-dependent fashion, during value-based decision-making. Across  
308 individuals, the subjective perception of nicotine strength parametrically correlated with neural  
309 activities in thalamus. At the circuitry level, the functional coupling between thalamus and  
310 vmPFC also scaled parametrically to belief “dose”. Taken together, these findings demonstrate  
311 the precise mapping between beliefs and neural activities in a prefrontal-thalamic circuit.

312

313 While humans hold beliefs about a wide range of stimuli and events, beliefs about substances are  
314 particularly important to examine due to their high relevance regarding substance use disorders.  
315 Here we demonstrated that nicotine-related beliefs are mapped onto neural states of the brain  
316 circuits that are critically involved in nicotine addiction in a way that mimics dose-responses of  
317 pharmacological agents. The thalamus — especially its posterior portion — contains one of the  
318 highest densities of nAChRs in the human brain<sup>20</sup> as quantified by both autoradiography<sup>19,42,43</sup>

Perl et al.

319 and functional imaging<sup>44,45</sup>. This anatomical feature is hypothesized to account for the attention-  
320 enhancing effect of nicotine<sup>44,46</sup> as the thalamus is known to be central for gate incoming sensory  
321 information. Indeed, previous work has demonstrated acute dose-dependent responses induced  
322 by nicotine itself in the human thalamus<sup>45</sup>. Importantly, previous work showed that even when  
323 nicotine level was moderate or close to none, smoking cigarettes can induce a substantial level of  
324 occupancy of nAChRs in the thalamus in human smokers<sup>22-24</sup>. This suggested that habitual  
325 behaviors that had been previously reinforced by the intake of nicotine (e.g., the act of smoking  
326 itself) can modulate thalamic activity irrespective of actual nicotinic content. However, the  
327 mechanism linking the effect of this observable behavior to subjective states remained unclear.  
328 Our study further reveals a granular mechanism that might account for these previous findings –  
329 that difference in neural activations can be triggered by manipulating one’s beliefs about nicotine  
330 intake (which likely acts as precursors of explicit habitual actions), as if the nAChRs receptors  
331 were activated by the presence of actual different dosages of nicotine. This implies that cognitive  
332 constructs such as beliefs and expectations can modulate fine-grained biological mechanisms in  
333 the human brain in a way that is similar to pharmacological agents.

334

335 We also found that vmPFC-thalamus functional coupling during decision-making also  
336 distinguished between belief conditions. The vmPFC has been extensively studied in the context  
337 of value-based decision-making processes and has been proposed to encode a “common  
338 currency” of subjective value<sup>47</sup>. In serving this role, the vmPFC has been shown to receive input  
339 from both the ventral tegmental area and the basal ganglia via the thalamus<sup>17</sup>. Importantly, more  
340 recent computational accounts suggest that the vmPFC encodes task states, including forming  
341 abstract representations of task structures that are not directly observable<sup>48</sup>. Consistent with our  
342 current finding, the functional connectivity between vmPFC and thalamus has also been shown  
343 to subserve prior expectations about incoming visual stimuli<sup>49</sup>. Here, our finding expands  
344 previous work by demonstrating that instead of functioning as a binary “switch”, the vmPFC-  
345 thalamus circuit encodes information related to beliefs and expectations in a parametric manner,  
346 highlighting the importance and precision of this circuitry in representing abstract mental states.

347

348 In contrast to the thalamus, the ventral striatum tracked reward value overall, without  
349 distinguishing between belief conditions. This result is different from a previous study where the  
350 belief of “yes” or “no” nicotine modulated activities in the ventral striatum (but not thalamus) in  
351 smokers<sup>10</sup>. We speculate that this discrepancy is mainly due to differences in study design  
352 between the current and previous studies. Importantly, the current study design uses e-cigarettes  
353 to deliver nicotine to participants were not experienced with vaping, as opposed to the use of  
354 traditional cigarettes that smokers were highly experienced with in previous work<sup>10,11</sup>. This  
355 “incongruency effect” could have removed conditioned responses related to smoking in the  
356 smokers in the current study, as substance-dependent humans are known to be sensitive to  
357 subtleties in sensory cues associated with the medium through which the drug is delivered<sup>50,51</sup>.  
358 As the striatum is heavily involved in reinforcement learning, it is not surprising that striatal

Perl et al.

359 activities showed a response to instructed beliefs in such study design where the mere presence  
360 of a cigarette could induce strong conditioned effects. Thus, the identified finding regarding the  
361 thalamic circuit represents a mapping between beliefs and neurobiology that is less dependent on  
362 conditioned effect as reported in previous work. Furthermore, the average nicotine level was  
363 higher in the current study (~0.8 mg from vaping) than that of our own previous work (~0.6  
364 mg)<sup>10</sup>. Because the thalamus contains a higher density of nAChRs than the striatum, a higher  
365 level of consumed nicotine might amplify thalamus-related activities that are primarily tied to  
366 nicotine's pharmacological effects in this study, as opposed to learned effects in the previous  
367 study<sup>4,10,11</sup>.

368  
369 In sum, our study provides insight into how a thalamic circuitry represents nicotine-related belief  
370 "dosage" in a manner that resembles pharmacological dose-dependent effects. Elucidating the  
371 precise mapping mechanism between beliefs and brain states might be important for  
372 understanding the key roles cognitive constructs play in human addiction, heterogenous  
373 responses to pharmacological treatments<sup>5</sup>, and neural mechanisms of psychotherapeutic effects .  
374 As such, this finding opens up new avenues for systematically leveraging the impact of  
375 narratives on the brain in mental health research and treatment.

376

## 377 **Materials and Methods**

### 378 Participants

379 The study was approved by the Institutional Review Board of the University of Texas at Dallas  
380 and the University of the Texas Southwestern Medical Center where data collection was  
381 conducted. All participants signed informed consent before participating in the study.

382

383 *Smokers:* Using a similar fMRI learning task and factorial design, a previous study of belief-drug  
384 interaction in nicotine addiction (N = 24 per condition) yielded an effect size of Cohen's d = 0.69  
385 for reward learning. Based on this, we estimated an n = 20 in each belief condition in the final  
386 sample would provide 90% power to detect an effect of this magnitude at alpha = 0.05 (two-  
387 tailed). Further, sample size calculation with G\*Power V3.1.9.7. assuming a three-measurements  
388 repeated-measures ANOVA F-test with an effect size of 0.4, alpha = 0.05, and power = 0.95,  
389 suggested a minimally required sample size of 18 participants.

390

391 Based on this power calculation, we recruited nicotine-dependent adult participants from the  
392 Dallas-Fort Worth (DFW) metropolitan area (total n=23 and final n=20). Inclusion criteria  
393 include an age of 18 years and older, normal or adjusted to normal vision, and smoking a  
394 minimum of 10 cigarettes a day for a period exceeding one year but with no prior experience  
395 with vaping devices or current attempt to quit smoking. Exclusion criteria included the use of  
396 illicit drugs in the past two months, a history of traumatic brain injury, any current substance  
397 abuse (excluding nicotine and alcohol), any contraindication to MRI, or previous or current  
398 psychiatric, neurological, or major medical conditions. Twenty-three participants enrolled in this

Perl et al.

399 study and underwent three fMRI sessions, spaced about one week apart. Three participants were  
400 excluded from analysis for the following reasons: one participant was excluded due to software  
401 malfunction, one due to falling asleep in the scanner and one due to loss of behavioral data for  
402 one of the scanning sessions. The final sample therefore comprised of 20 participants (6 females,  
403 age:  $41.1 \pm 11.97$  years, age range: 24-61 years). Participants were all right-hand dominant.

404  
405 *Non-smoking healthy controls (HC)*: In an exploratory analysis, we compared neural activities of  
406 the nicotine addicted cohort to those of a healthy controls (HC) cohort which engaged in the  
407 same task in the same imaging facility. Thirty-three healthy volunteers (15 females, aged  $28 \pm 9$   
408 years) were recruited for the study using similar criteria as smokers, other than nicotine addiction  
409 being an additional exclusion criterion. The sample size for HCs was larger than the required  $n$   
410 for smokers as HC data were taken from another study with different overall design and  
411 hypotheses.

412 Two participants were excluded from neural analyses due to excessive head movement ( $>3$  mm),  
413 leaving a final sample size of 31.

414

#### 415 Experimental design

416 Upon arrival at the laboratory, participants completed demographic, mental health (Positive and  
417 Negative Affect Schedule, Beck's Depression Inventory, Empathy Quotient, Toronto  
418 Alexithymia Scale, Behavioral Inhibition System and Domain-Specific Risk-Taking  
419 questionnaires), general substance and alcohol use (Drug Abuse Screening Test, Short Michigan  
420 Alcohol Screening Test), and nicotine-specific surveys (Fagerström Test for Nicotine  
421 Dependence, Wisconsin Withdrawal Scale, Shiffman-Jarvik Withdrawal scale). Participants  
422 provided saliva samples for measuring cotinine, the primary metabolite of nicotine. Saliva  
423 samples were collected using a passive drool method until a volume of 1.8 – 2ml was obtained.  
424 They were then coded and stored in designated freezers until sent for analysis. Participants'  
425 exhaled carbon monoxide (CO) levels served as proxy for their satiety status. These were  
426 acquired by a Smokerlyzer (coVita micro+basic, Santa Barbara, CA) prior to e-cigarette vaping  
427 in each session. The measurement took place in a designated behavioral testing rooms adjacent  
428 to the scanners. Participants continuously exhaled through a designated straw until a  
429 measurement appeared on screen.

430

431 For nicotine delivery, we used the “blu” e-cigarette atomizer (blu, UK) with disposable 1.2%  
432 nicotine cartridges in the ‘classic tobacco’ flavor. Following the fMRI scans, participants  
433 repeated the state-based series of surveys and provided a second saliva sample.

434

435 Three participants' data were removed from cotinine analysis: two due to cotinine readings  
436 exceeding 3 standard deviations from the mean of the cohort and one due to missing data. Data  
437 for all three sessions (instructed beliefs conditions) were discarded from this analysis. Three  
438 participants' data (non-overlapping with the previous omission) were removed from CO

Perl et al.

439 analysis: two due to readings exceeding 3 standard deviations from times the mean of the cohort  
440 and one due to missing data. Once again, data for all three sessions (instructed beliefs conditions)  
441 were discarded from this analysis.

442  
443 Prior to vaping, the e-cigarette cartridge was weighed three times on a high precision scale and  
444 the average of the three measurements was logged as the baseline weight of the cartridge. A  
445 similar procedure was done post-vaping and the change in cartridge weight represented the  
446 amount of nicotine liquid consumed by the participant. Using a double-blind procedure, neither  
447 participants nor the research assistants (M.H. and A.K.) responsible for data collection had prior  
448 knowledge about the true nicotine content in the e-cigarettes. The order of belief conditions was  
449 randomly assigned for each participant. The e-cigarette cartridges were carefully re-labelled as  
450 'low', 'medium', or 'high' by the PI (X.G.) herself to avoid un-blinding by either the participant  
451 or the research assistants.

452  
453 Notably, the same type of cartridges containing 1.2% nicotine were used across all participants  
454 and sessions. Research assistants (M.H. and A.K.) who interacted with the participants adhered  
455 to a fixed text during the manipulation stating: "The cartridge you will use today will contain:  
456 [mild-to-no nicotine] / [a medium amount of nicotine] / [a high amount of nicotine]." These  
457 experimenters also made sure that participants used the e-cigarette properly, the device was well  
458 powered, and that vapor was visible. Participants were told they could vape as much as they wish  
459 for the next 20 minutes and were left alone to vape. After 20 minutes they were questioned about  
460 any issues with the e-cigarette. Participants were then prompted to reply how they would rate the  
461 strength of the nicotine in the e-cigarette on a scale of 0 to 10, compared to a normal cigarette.

462  
463 Cotinine detection in saliva  
464 *Chemicals and reagents:* Optima LC-MS grade acetonitrile, water and methanol were purchased  
465 from Fisher Scientific (New Jersey, USA). Reagent grade ammonium formate was purchased  
466 from Sigma Aldrich (Missouri, USA). Cotinine was purchased from Sigma Aldrich. Rac-  
467 cotinine-d3 was obtained from Toronto Research Chemicals (Ontario, CAN). All other  
468 chemicals and reagents were of analytical grade and used without further purification. Blank  
469 human saliva procured from primary investigator. (New York, USA).

470  
471 *Preparation of stock and working solutions of analyte and internal standard:* Primary stock  
472 solutions of cotinine for the calibration curve (CC) and quality control samples (QC) were  
473 prepared from a 1 mg/mL stock solution in methanol. Stock solutions of cotinine were stored at -  
474 20 °C, and subsequent dilutions were conducted using water. Primary stock solutions of the  
475 bioanalytical method's internal standard (IS) d3-cotinine were prepared by accurately weighing  
476 d3-cotinine and dissolving in methanol to yield a 1 mg/mL stock solution. Stock solutions of d3-  
477 cotinine were stored at -20 °C, and subsequent dilutions were conducted using water. For spiking  
478 of saliva samples with cotinine, a working stock solution of 1000 ng/mL cotinine in water was



Perl et al.

479 prepared and stored at -20 °C. For spiking of saliva samples with d3-cotinine, a working stock  
480 solution of 300 ng/mL d3-cotinine in water was prepared and stored at -20 °C.

481  
482 *Preparation of calibration curve and quality control samples for analysis of saliva samples:*  
483 Cotinine was validated over a calibration range that supports low concentration and high  
484 concentration samples. The calibration curve ranged from 5 ng/mL to 1000 ng/mL. Calibration  
485 curve samples were prepared by spiking 1µL of the working stock (1 mg/mL cotinine in water)  
486 into 250 µL of saliva. This represented the top calibration curve point (i.e., the upper limit of  
487 quantification or ULOQ). The remaining calibration curve samples were prepared by serial  
488 dilution of the ULOQ standard in saliva. Quality control was prepared in a similar fashion by  
489 spiking 80 µL of the working stock (1000 ng/mL cotinine in water) into 250 µL of plasma. This  
490 represented the high-quality control standard (HQC). The medium-quality control standard  
491 (MQC) and low-quality control standard (LQC) were prepared by serial dilution of the HQC  
492 standard in saliva. Spiking volume of the working standard did not exceed 5% of the matrix  
493 volume. QCs for the calibration curve were prepared at 5, 30, and 80 ng/mL.

494  
495 *Saliva Collection:* Patients provided a saliva sample collected at various time-points throughout a  
496 session. Samples were collected using a passive drool method (i.e., Salimetrics ‘SalivaBio’  
497 collection aid). Saliva samples were analyzed for cotinine concentrations using a validated LC-  
498 MS/MS method.

499  
500 *Saliva Sample Preparation:* Acetonitrile (350 µL) and 100 µL (300 ng/mL) d3-cotinine was  
501 added to a 250 µL aliquot of saliva. The resultant mixture was centrifuged for 5 min at 5000 rpm  
502 at a temperature of 4°C. Five hundred microliters (500µL) of the clear supernatant, was removed,  
503 placed in a new Eppendorf tube, and dried using a SpeedVac. Samples were reconstituted using  
504 250 µL of water.

505  
506 *HPLC operating conditions:* A Shimadzu CBM-20A Nexera X2 series LC system (Shimadzu  
507 Corporation, Kyoto, Japan) equipped with degasser (DGU-20A) and binary pump (LC-30AD)  
508 along with auto-sampler (SIL-30AC) and (CTO-30A) column oven. The autosampler was  
509 maintained at 15 °C. An injection volume of 1 µL was used and chromatographic separation was  
510 achieved using a Kinetex Biphenyl (2.6 µm, 50 × 2.1mm) column. The mobile phase, consisting  
511 of 2mM ammonium formate in water (pump A) and methanol:water (95:5) with 0.2% formic  
512 acid (pump B) used for the method. The mobile phase pumped using a gradient program at a  
513 flow rate of 0.8 mL/min into the mass spectrometer electrospray ionization chamber in positive  
514 polarity. Gradient program initiated with 5% of B and maintained for 1.0min, then ramped to  
515 75%B by 2.5min and maintained at 75%B until 3.5min, changed back to 5%B by 4.0min and  
516 maintained until 6.01min at the end system controller stop command.

517



Perl et al.

518 *Mass spectrometry operating conditions:* Quantitation was achieved employing electrospray  
519 ionization in positive ion mode for the analytes using a SCIEX QTRAP 6500+ mass  
520 spectrometer (Redwood, CA, USA) equipped with the Turbo V source operated at 550 °C. The  
521 nebulizer gas, auxiliary gas, curtain gas, CAD gas were set at 45, 45, 30 psi and ‘medium’,  
522 respectively. The declustering potential (DP), collision energy (CE), entrance potential (EP) and  
523 collision cell exit potential (CXP) were 141, 31, 10, 10 V for (Cotinine-1); 141, 47, 10, 8 V for  
524 (Cotinine-2); 141, 31, 10, 12 V for (d3-Cotinine-1); and 141, 29, 10, 8 V for (d3-Cotinine-3),  
525 respectively. Detection of the ions was carried out in the multiple-reaction monitoring mode  
526 (MRM), by monitoring the precursor > product transitions of 177.0 > 80 and 177.0 > 98.0 (sum  
527 over 2 MRMs) for cotinine and 181.2 > 80.1 and 181.2 > 101.1 (sum over 2 MRMs) for d3-  
528 cotinine. The data obtained were processed by Analyst software™ (version 1.6.3).

529  
530 *Method Validation:* The methods for analysis of cotinine in saliva were validated according to  
531 the United States FDA’s May 2018 Guidance for Industry on ‘Bioanalytical Method Validation’.  
532 The method was found to have acceptable sensitivity, selectivity, matrix effect, linearity,  
533 accuracy, precision, recovery, dilution integrity and stability.

#### 534 Value-based decision-making task

535 This task was developed based on a previous investment task<sup>10,26</sup> but with the modification that  
536 participants were allowed to place both positive (‘invest’) and negative (‘short’) bets. Briefly,  
537 participants were allocated an initial sum of 100 monetary units (i.e., their portfolio) at the  
538 beginning of the experiment which could be invested in stock markets. Participants were  
539 informed that their final payment would be scaled according to their actual gains or losses in the  
540 task. Each participant played a total of 10 markets per visit, each consisting of 20 trials. The  
541 stock market prices in the task were chosen from true historical stock market prices. Each task  
542 block commenced by a caption titled ‘new market’ followed by a graphic display of past market  
543 dynamics.

544  
545  
546 In each trial  $t$ , the participant observes the price history of a stock market (including the trial  
547 before,  $p_{t-1}$ ) and places a bet,  $b_t$ . Next, a new market price  $p_t$  is revealed, and portfolio amounts  
548 are updated to reflect the recent outcome. The fractional market return  $r_t$  is defined as  $r_t = (p_t -$   
549  $p_{t-1}) / p_{t-1}$ . In each of the 20 trials, participants had unconstrained time to decide on their  
550 investment moves. Participants were able to choose to either invest normally (if they think the  
551 price will go up) or short sell (if they think the price will go down). Notably, shorting the market  
552 would result in gaining from market drops. Thus, people could benefit from either a positive or  
553 negative price change and the absolute value of market return  $|r_t|$  represents the magnitude of the  
554 potential gain. Participants provided their choice using a slider bar and finalized their choice by a  
555 button press. Following a 750 ms delay, the new market price was revealed and the fractional  
556 change in market price was applied to the portfolio. In later analyses this event is termed ‘market  
557 reveal’. Each trial concluded in a 750 ms inter-trial interval in which the slider turned gray and

Perl et al.

558 became unresponsive. A total of 30 different markets were used across all three visits. Mean  
559 session duration in the stock market task was  $14.91 \pm 3.06$  minutes and did not differ across  
560 conditions (rmANOVA  $F(2,59) = 0.28, P = 0.76$ ).

561

#### 562 Imaging acquisition and preprocessing

563 Whole-brain anatomical and functional MRI data were acquired on a Philips Achieva scanner  
564 with a 3T field strength. High-resolution T1-weighted scans ( $1.0 \times 1.0 \times 1.0$  mm) were acquired  
565 using a 3D magnetization prepared rapid gradient-echo (MPRAGE) sequence. Functional images  
566 were acquired using echo-planar imaging (EPI) and tilted  $30^\circ$  from AC-PC axis. The detailed  
567 settings for the functional imaging were repetition time (TR) = 2,000 ms, echo time (TE) = 25  
568 ms, flip angle =  $90^\circ$ , voxel size =  $3.4 \times 3.4 \times 4.0$  mm, 38 slices. The average number of  
569 functional images acquired was  $457.37 \pm 91.67$ . All imaging data were preprocessed using  
570 standard statistical parametric mapping (SPM12, Wellcome Department of Imaging  
571 Neuroscience) algorithms ([fil.ion.ucl.ac.uk/spm](http://fil.ion.ucl.ac.uk/spm)). Functional images were applied a slice time  
572 correction.

573

574 To account for large head movements often caused by participants' coughing during the scan, we  
575 used the ArtRepair toolbox<sup>52</sup> to examine and repair volumes with large motion artifacts. We used  
576 the *art\_motionregress* and *art\_global* modules of the single subject pipeline. The ArtRepair  
577 algorithm was further used to generate the motion parameters to be included in the GLM design  
578 matrix. Volumes were examined for fast head movements using the automated defaults such that  
579 volumes with movement of  $>0.5$  mm/TR were tagged and interpolated with the nearest usable  
580 volumes. Overall, 6 out of 60 scans were repaired. The mean functional images for each subject  
581 were co-registered to the subject's high-resolution T1 structural scan, using a 12-parameter  
582 affine transformation. The participant's T1 image was segmented into gray and white matter and  
583 then normalized using nonlinear basis functions to the Montreal Neurological Institute (MNI)  
584 space with the functional images normalized to the template and resampled into  $3.4 \times 3.4 \times 4$ -  
585 mm functional voxels. Functional images were smoothed spatially using a 6 mm full-width at  
586 half-maximum Gaussian kernel. A temporal high-pass filter of 128 Hz was applied to the fMRI  
587 data, and temporal autocorrelation was modeled using a first-order autoregressive function.

588

#### 589 Statistical analysis

590 Throughout this study, we used a within-participant repeated measures ANOVA implemented in  
591 MATLAB (*anova\_rm*) to assess differences between the three conditions of instructed belief.  
592 Normality was assessed with Shapiro-Wilk tests wherever appropriate. During analysis of the  
593 various controls if data for one of the sessions was missing, that participant was excluded from  
594 this specific analysis. For neural data, we specified the statistical thresholds and rationale in the  
595 fMRI methods sections below. In the case of between-group comparison between smokers and  
596 HC, we used two-sample t-tests, conducted separately for each level of instructed belief.

597

Perl et al.

## 598 Behavioral modeling

599 We examined the impact of the value signal of market return  $|r_t|$  on participants choice behavior,  
600 operationalized as their next bet,  $|b_{t+1}|$ , using a linear mixed-effects multiple-regression model.  
601 The final return of each market was excluded from the regression, as there was no investment  
602 decision following the final market segment. Similarly, the first trial was also removed since it  
603 had no preceding investment decision. In line with previous investigations<sup>10</sup>, our parameter of  
604 interest was instructed belief, expressed as a 3-level interaction (the first level, i.e., ‘low’ belief  
605 served as baseline) modulating market return,  $|r_t|$ <sup>10</sup>.

606  
607 In order to test whether there was an interacting or a moderating effect of belief on the  
608 relationship between market return and next bet, we first tested two plausible models, with- and  
609 without an interaction of  $|r_t|$  and instructed belief. The results suggested that the interaction  
610 effect did not improve model fit. We therefore modeled choice behavior as follows:

$$611 \quad |b_{t+1}| \sim 1 + |b_t| + |r_t| + \text{InstructedBelief} + (1 + \text{InstructedBelief} | \text{participant})$$

612  
613  
614 Multiple regression was carried out in R (RStudio 1.1.463, 2018) using the ‘lmer’ function as  
615 follows in the ‘lme4’ package  $P$  values were approximated via Satterthwaite’s degrees of  
616 freedom method. The inclusion of instructed belief as a random effect was guided by the notion  
617 that the effects of belief are likely heterogenous across the cohort. This intuition was backed up  
618 by model comparison between the two options (with / without belief as a random effect) using  
619 the ‘anova’ function ( $P < 2.2e-16$ ).

620  
621 General linear modeling (GLM) of fMRI data  
622 Event-related analyses of the fMRI data were conducted using SPM12 (Wellcome Department of  
623 Imaging Neuroscience). We conducted general linear modeling (GLM) of the functional scans of  
624 each participant by modeling the observed BOLD signals and regressors to identify the  
625 relationship between the task events and the hemodynamic response. Regressors related to all  
626 visual and motor events were created by convolving a train of delta functions representing the  
627 sequence of individual events with the default basis function in SPM12, which consists of a  
628 synthetic hemodynamic response function composed of two gamma functions. The GLM  
629 included six separate regressors: (1) new market screen display; (2) market history display; (3)  
630 all key presses; (4) market price reveal of trial 1; (5) market price reveal of trials 2–19; (6)  
631 market price reveal of trial 20. Additionally, six parameters generated during motion correction  
632 were entered as covariates. In the GLM, absolute market return  $|r|$  was entered as a parametric  
633 modulator of market reveal of trials 2–19. We carried out linear contrasts of the parameter  
634 estimates to identify the effects in each participant.

635  
636 Statistical maps from all participants were then entered into a second-level group analysis to  
637 implement a random-effects statistical model. A within-subject repeated-measures ANOVA

Perl et al.

638 model was conducted for the factor of instructed beliefs ('low', 'medium', 'high'). Statistical  
639 inference was made based on the  $F$  statistics derived from whole-brain rmANOVA statistical  
640 maps. Significant effects were identified at  $P < 0.05$  family-wise error cluster-corrected at a  
641 cluster-defining threshold of  $P < 0.005$ , uncorrected with a cluster size threshold of  $k = 50$ . We  
642 relied in cluster-extend thresholding in our statistical inference in order to allow sufficient  
643 sensitivity to detect effects given the experimental sample size<sup>53</sup> while implementing thresholds  
644 recommended for a balance between Type I and Type II errors<sup>54</sup>. Maps were rendered using  
645 MRIcroGL v1.2.2.

646

#### 647 Thalamic parcellation and ROI analyses

648 We extracted parameter estimates from bilateral thalamus using an anatomical mask (WFU Pick  
649 atlas<sup>28</sup>). Thalamic parcellations were obtained from the Lead-DBS MATLAB toolbox. Each  
650 segmented nucleus or region was transformed into the experimental dataset's functional space  
651 using the MarsBaR toolbox. The THOMAS (Thalamus optimized multi-atlas segmentation)  
652 atlas<sup>29</sup> contains 12 non-overlapping nuclei, three of which (vLA, MGN and MTT) were too small  
653 to be meaningfully transformed to our functional space and were therefore not used. As before,  
654 we modeled BOLD activity tracking of fluctuations in magnitude of market return,  $|r|$ , and  
655 carried out a group analysis with a within-subject rmANOVA design per region of the thalamic  
656 parcellation. To account for multiple comparisons, we applied the false-detection rate (FDR)  
657 correction to the extracted ROIs at  $q = 0.05$ .

658

#### 659 Permutation analysis

660 We iteratively shuffled labels for instructed beliefs ('low', 'medium', 'high') within each  
661 participant while maintaining their original ratio (i.e., one of each per participant). For each  
662 viable permutation (i.e., a permutation whose model estimation converged and yielded any  
663 significant voxels), a within-subject rmANOVA was carried out, following which a parameter  
664 estimate was derived from the same ROI as the original design matrix to generate a surrogate  
665 distribution of beta estimates ( $N = 1,000$ ).

666

#### 667 Classification analysis:

668 We decoded instructed belief conditions ('low', 'medium', 'high') from multivoxel spatial  
669 patterns data using a rLDA (regularized linear discriminant analysis classifier, 'fitdiscr' function  
670 in MATLAB)<sup>30,31</sup>. Input data consisted of 20 participants' first-level GLM maps X 3 conditions  
671 along with corresponding belief condition labels, which were used to train the rLDA. A 10-fold  
672 cross-validation sample size was used. To test the model's performance on we iteratively  
673 repeated this process with permuted data partitions ( $N = 10,000$  for the whole thalamus / NAcc,  
674  $N = 1,000$  for thalamic nuclei) per ROI and compared classification accuracy of ground truth  
675 data to the surrogate distribution using non-parametric testing.

676

#### 677 Psycho-physiological interaction (PPI) analysis

Perl et al.

678 PPI analysis provides a measure of change in functional connectivity between different brain  
679 regions under a specific psychological context<sup>39</sup>. We defined a seed region – the thalamus – as  
680 defined by the WFU anatomical atlas and a psychological context (‘market reveal’ – the  
681 presentation of the investment’s return). We then conducted a PPI analysis per condition of  
682 instructed beliefs and compared those in a within-subject repeated-measures design. The  
683 generated PPI model included the PPI term, the physiological regressor, the psychological  
684 regressor, and nuisance regressors of six motion parameters.

685  
686 A 6 mm spherical ROI was defined based on previous investigation of the neural mechanisms of  
687 belief-formation in the vmPFC by Rouault and Fleming<sup>40</sup>. Sphere center was set to reflect the  
688 coordinate of peak activation (MNI x = -6, y= 52, z = -10). In the follow-up exploratory analysis,  
689 the threshold of significance for the group-level rmANOVA from the PPI regressor was set to be  
690  $P < 0.05$  FWE cluster-corrected at a cluster-defining threshold of  $P < 0.005$ , uncorrected.

691

#### 692 **Data availability**

693 Data supporting the findings of this study are deposited in: <https://osf.io/3hq6s/>

694

#### 695 **Code availability**

696 The scripts used for data acquisition and analysis are available in: <https://osf.io/3hq6s/>

697 Analyses were conducted using open software and toolboxes available online as described in

698 Materials and Methods (SPM: [www.fil.ion.ucl.ac.uk/spm/software/spm12/](http://www.fil.ion.ucl.ac.uk/spm/software/spm12/);

699 R Studio: <https://www.rstudio.com/products/rstudio/download/#download/>;

700 Lead-DBS: <https://www.lead-dbs.org/download/>;

701 MRICroGL: <https://www.nitrc.org/projects/mricrogl/>)

702

#### 703 **Acknowledgements**

704 We thank staff members at the UT Southwestern Imaging Center for their assistance with  
705 scanning, Jennifer Jung and Mark Labinski for their help with developing the fMRI task, and  
706 Jessica Maclin for her help with participant recruitment. We also thank Dr. Laura Berner for her  
707 advice on the statistical analysis, and Drs. Daniela Schiller and Paul Kenny for their helpful  
708 discussions and comments on an earlier version of this manuscript.

#### 709 **Author contributions**

710 Conceptualization: XG.

711 Methodology: OP, AS, NB, WCP, XG

712 Investigation: MH, SN, AK

713 Visualization: OP

714 Funding acquisition: XG

715 Project administration: MH, XG

716 Supervision: XG

717 Writing – original draft: OP, WCP, VGF, XG

Perl et al.

718 Writing – review and editing: OP, VGF, XG

719 **Competing interests**

720 The authors declare that they have no competing interests.

721

722 **Funding**

723 National Institute on Drug Abuse grant R01DA043695 (XG)

724 National Institute on Drug Abuse grant R21DA049243 (XG)

725 University of Texas, Dallas internal funding (XG)

726 Mental Illness Research, Education, and Clinical Center at the James J. Peter Veterans Affairs

727 Medical Center grant MIRECC VISN 2 (VGF)

728

729 **Supplementary information**

730 Supplementary Figs. 1 to 8

731 Supplementary Table 1



Perl et al.

## 732 References

- 733 1. Posner, M. I., Petersen, S. E., Fox, P. T. & Raichle, M. E. Localization of cognitive  
734 operations in the human brain. *Science* **240**, 1627–1631 (1988).
- 735 2. Gu, X., FitzGerald, T. H. B. & Friston, K. J. Modeling subjective belief states in  
736 computational psychiatry: interoceptive inference as a candidate framework.  
737 *Psychopharmacology (Berl)*. **236**, 2405–2412 (2019).
- 738 3. Goldstein, R. Z. *et al.* The Neurocircuitry of Impaired Insight in Drug Addiction. *Trends*  
739 *Cogn. Sci.* **13**, 372–380 (2009).
- 740 4. Volkow, N. D. & Baler, R. Beliefs modulate the effects of drugs on the human brain.  
741 *Proc. Natl. Acad. Sci. U. S. A.* **112**, 2301–2302 (2015).
- 742 5. Kirsch, I. Response expectancy as a determinant of experience and behavior. *Am. Psychol.*  
743 **40**, 1189–1202 (1985).
- 744 6. Mayberg, H. S. *et al.* The functional neuroanatomy of the placebo effect. *Am. J.*  
745 *Psychiatry* **159**, 728–737 (2002).
- 746 7. Wager, T. D. *et al.* Placebo-induced changes in fMRI in the anticipation and experience  
747 of pain. *Science* **303**, 1162–1167 (2004).
- 748 8. Benedetti, F., Mayberg, H. S., Wager, T. D., Stohler, C. S. & Zubieta, J. K.  
749 Neurobiological mechanisms of the placebo effect. *J. Neurosci.* **25**, 10390–10402 (2005).
- 750 9. Price, D. D., Finniss, D. G. & Benedetti, F. A comprehensive review of the placebo effect:  
751 Recent advances and current thought. *Annu. Rev. Psychol.* **59**, 565–590 (2008).
- 752 10. Gu, X. *et al.* Belief about nicotine selectively modulates value and reward prediction error  
753 signals in smokers. *Proc. Natl. Acad. Sci. U. S. A.* **112**, 2539–2544 (2015).
- 754 11. Gu, X. *et al.* Belief about nicotine modulates subjective craving and insula activity in  
755 deprived smokers. *Front. Psychiatry* **7**, 1–11 (2016).
- 756 12. Benowitz, N. L., Jacob, P. & Herrera, B. Nicotine intake and dose response when smoking  
757 reduced-nicotine content cigarettes. *Clin. Pharmacol. Ther.* **80**, 703–714 (2006).
- 758 13. Bisby, J. A., Leitz, J. R., Morgan, C. J. A. & Curran, H. V. Decreases in recollective  
759 experience following acute alcohol: A dose-response study. *Psychopharmacology (Berl)*.  
760 **208**, 67–74 (2010).
- 761 14. Curran, V. H., Brignell, C., Fletcher, S., Middleton, P. & Henry, J. Cognitive and  
762 subjective dose-response effects of acute oral  $\Delta^9$ -tetrahydrocannabinol (THC) in  
763 infrequent cannabis users. *Psychopharmacology (Berl)*. **164**, 61–70 (2002).
- 764 15. Watkins, S. S., Koob, G. F. & Markou, A. Neural mechanisms underlying nicotine  
765 addiction: Acute positive reinforcement and withdrawal. *Nicotine Tob. Res.* **2**, 19–37  
766 (2000).
- 767 16. Huang, A. S., Mitchell, J. A., Haber, S. N., Alia-Klein, N. & Goldstein, R. Z. The  
768 thalamus in drug addiction: From rodents to humans. *Philos. Trans. R. Soc. B Biol. Sci.*  
769 **373**, (2018).
- 770 17. Haber, S. N. & Knutson, B. The reward circuit: Linking primate anatomy and human  
771 imaging. *Neuropsychopharmacology* **35**, 4–26 (2010).
- 772 18. Shohamy, D. Learning and motivation in the human striatum. *Curr. Opin. Neurobiol.* **21**,  
773 408–414 (2011).
- 774 19. Spurdén, D. P. *et al.* Nicotinic receptor distribution in the human thalamus:  
775 Autoradiographical localization of [3H]nicotine and [125I] $\alpha$ -bungarotoxin binding. *J.*  
776 *Chem. Neuroanat.* **13**, 105–113 (1997).
- 777 20. Paterson, D. & Nordberg, A. Neuronal nicotinic receptors in the human brain. *Prog.*

Perl et al.

- 778 *Neurobiol.* **61**, 75–111 (2000).
- 779 21. Gotti, C. *et al.* Nicotinic acetylcholine receptors in the mesolimbic pathway: Primary role  
780 of ventral tegmental area  $\alpha 6\beta 2^*$  receptors in mediating systemic nicotine effects on  
781 dopamine release, locomotion, and reinforcement. *J. Neurosci.* **30**, 5311–5325 (2010).
- 782 22. Brody, A. L. *et al.* Cigarette smoking saturates brain alpha 4 beta 2 nicotinic acetylcholine  
783 receptors. *Arch. Gen. Psychiatry* **63**, 907–915 (2006).
- 784 23. Brody, A. L. *et al.* Brain nicotinic acetylcholine receptor occupancy: Effect of smoking a  
785 denicotinized cigarette. *International Journal of Neuropsychopharmacology* vol. 12 305–  
786 316 (2009).
- 787 24. Brody, A. L. *et al.* Effect of secondhand smoke on occupancy of nicotinic acetylcholine  
788 receptors in brain. *Arch. Gen. Psychiatry* **68**, 953–960 (2011).
- 789 25. Petersen, G. O., Leite, C. E., Chatkin, J. M. & Thiesen, F. V. Cotinine as a biomarker of  
790 tobacco exposure: Development of a HPLC method and comparison of matrices. *J. Sep.*  
791 *Sci.* **33**, 516–521 (2010).
- 792 26. Lohrenz, T., McCabe, K., Camerer, C. F. & Montague, P. R. Neural signature of fictive  
793 learning signals in a sequential investment task. *Proc. Natl. Acad. Sci. U. S. A.* **104**, 9493–  
794 9498 (2007).
- 795 27. Chiu, P. H., Lohrenz, T. M. & Montague, P. R. Smokers’ brains compute, but ignore, a  
796 fictive error signal in a sequential investment task. *Nat. Neurosci.* **11**, 514–520 (2008).
- 797 28. Maldjian, J. A., Laurienti, P. J., Kraft, R. A. & Burdette, J. H. An automated method for  
798 neuroanatomic and cytoarchitectonic atlas-based interrogation of fMRI data sets.  
799 *Neuroimage* **19**, 1233–1239 (2003).
- 800 29. Su, J. H. *et al.* Thalamus Optimized Multi Atlas Segmentation (THOMAS): fast, fully  
801 automated segmentation of thalamic nuclei from structural MRI. *Neuroimage* **194**, 272–  
802 282 (2019).
- 803 30. Zander, T. O., Kothe, C., Jatzev, S. & Gaertner, M. Enhancing Human-Computer  
804 Interaction with Input from Active and Passive Brain-Computer Interfaces BT - Brain-  
805 Computer Interfaces: Applying our Minds to Human-Computer Interaction. in (eds. Tan,  
806 D. S. & Nijholt, A.) 181–199 (Springer London, 2010). doi:10.1007/978-1-84996-272-  
807 8\_11.
- 808 31. Mandelkow, H., De Zwart, J. A. & Duyn, J. H. Linear discriminant analysis achieves high  
809 classification accuracy for the BOLD fMRI response to naturalistic movie stimuli. *Front.*  
810 *Hum. Neurosci.* **10**, 1–12 (2016).
- 811 32. Volkow, N. D., Wang, G. J., Fowler, J. S., Tomasi, D. & Telang, F. Addiction: Beyond  
812 dopamine reward circuitry. *Proc. Natl. Acad. Sci. U. S. A.* **108**, 15037–15042 (2011).
- 813 33. Mikl, M. *et al.* Effects of spatial smoothing on fMRI group inferences. *Magn. Reson.*  
814 *Imaging* **26**, 490–503 (2008).
- 815 34. Shepherd, G. M. G. & Yamawaki, N. Untangling the cortico-thalamo-cortical loop:  
816 cellular pieces of a knotty circuit puzzle. *Nat. Rev. Neurosci.* **22**, 389–406 (2021).
- 817 35. Schuck, N. W. & Niv, Y. Sequential replay of nonspatial task states in the human  
818 hippocampus. *Science* **364**, (2019).
- 819 36. Rushworth, M. F. S. & Behrens, T. E. J. Choice, uncertainty and value in prefrontal and  
820 cingulate cortex. *Nat. Neurosci.* **11**, 389–397 (2008).
- 821 37. de Kloet, S. F. *et al.* Bi-directional regulation of cognitive control by distinct prefrontal  
822 cortical output neurons to thalamus and striatum. *Nat. Commun.* **12**, 1994 (2021).
- 823 38. Steward, T. *et al.* A thalamo-centric neural signature for restructuring negative self-

Perl et al.

- 824 beliefs. *Mol. Psychiatry* **27**, 1611–1617 (2022).
- 825 39. Friston, K. J. *et al.* Psychophysiological and Modulatory Interactions in Neuroimaging.  
826 *Neuroimage* **6**, 218–229 (1997).
- 827 40. Rouault, M. & Fleming, S. M. Formation of global self-beliefs in the human brain. *Proc.*  
828 *Natl. Acad. Sci. U. S. A.* **117**, 27268–27276 (2020).
- 829 41. Niv, Y. Learning task-state representations. *Nat. Neurosci.* **22**, 1544–1553 (2019).
- 830 42. Adem, A. *et al.* Distribution of nicotinic receptors in human thalamus as visualized by  
831 3H-nicotine and 3H-acetylcholine receptor autoradiography. *J. Neural Transm.* **73**, 77–83  
832 (1988).
- 833 43. Wong, D. F. *et al.* PET imaging of high-affinity  $\alpha 4\beta 2$  nicotinic acetylcholine receptors in  
834 humans with 18F-AZAN, a radioligand with optimal brain kinetics. *J. Nucl. Med.* **54**,  
835 1308–1314 (2013).
- 836 44. Lawrence, N. S., Ross, T. J. & Stein, E. A. Cognitive mechanisms of nicotine on visual  
837 attention. *Neuron* **36**, 539–548 (2002).
- 838 45. Stein, E. A. *et al.* Nicotine-Induced Limbic Cortical Activation in the Human Brain □: A  
839 Functional MRI Study. *Am. J. Psychiatry* **155**, 1009–1015 (1998).
- 840 46. Kumari, V. *et al.* Cognitive effects of nicotine in humans: An fMRI study. *Neuroimage*  
841 **19**, 1002–1013 (2003).
- 842 47. Levy, D. J. & Glimcher, P. W. The root of all value: A neural common currency for  
843 choice. *Curr. Opin. Neurobiol.* **22**, 1027–1038 (2012).
- 844 48. Schuck, N. W., Cai, M. B., Wilson, R. C. & Niv, Y. Human Orbitofrontal Cortex  
845 Represents a Cognitive Map of State Space. *Neuron* **91**, 1402–1412 (2016).
- 846 49. Barbalat, G., Bazargani, N. & Blakemore, S.-J. The Influence of Prior Expectations on  
847 Emotional Face Perception in Adolescence. *Cereb. Cortex* **23**, 1542–1551 (2012).
- 848 50. Perkins, K. A. *et al.* Effects of central and peripheral nicotinic blockade on human  
849 nicotine discrimination. *Psychopharmacology (Berl)*. **142**, 158–164 (1999).
- 850 51. Perkins, K. A., Herb, T. & Karelitz, J. L. Discrimination of nicotine content in electronic  
851 cigarettes. *Addict. Behav.* **91**, 106–111 (2019).
- 852 52. Mazaika, Whitfield-Gabrieli & Reiss..., A. Artifact repair for fMRI data from high  
853 motion clinical subjects. *Annu. Meet. ...* 321 (2007).
- 854 53. Woo, C.-W., Krishnan, A. & Wager, T. D. Cluster-extent based thresholding in fMRI  
855 analyses: Pitfalls and recommendations. *Neuroimage* **91**, 412–419 (2014).
- 856 54. Lieberman, M. D. & Cunningham, W. A. Type I and Type II error concerns in fMRI  
857 research: re-balancing the scale. *Soc. Cogn. Affect. Neurosci.* **4**, 423–428 (2009).
- 858

Perl et al.

859 Figures:

860

## Figure 1

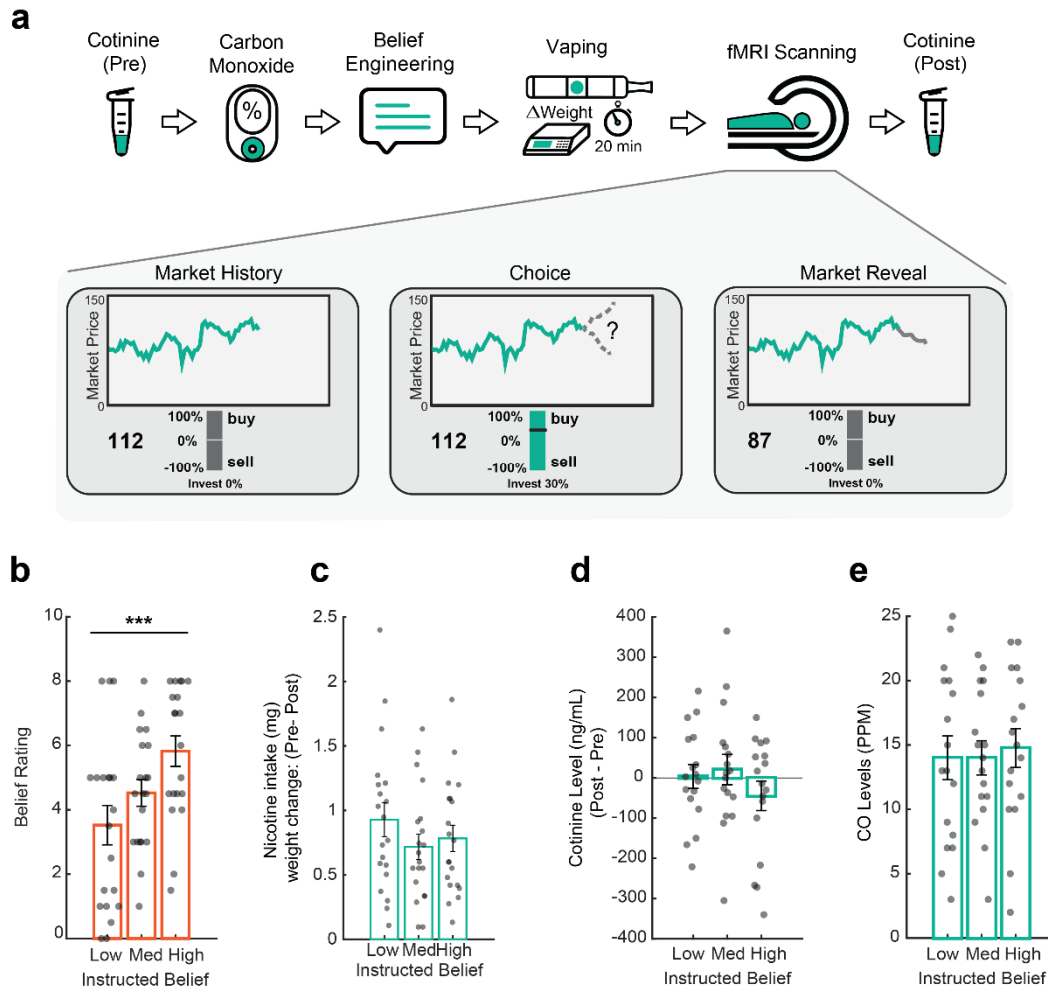

861

862 **Fig. 1. Experimental paradigm and sanity check measures.** (a) Participants completed three  
863 visits. In each visit, we collected saliva samples for cotinine measurement, measured carbon  
864 monoxide (CO) levels, instructed beliefs, and measured brain activities using fMRI as  
865 participants engaged in a decision-making task. (b) Subjective beliefs about nicotine strength  
866 increased as a function of instructed nicotine strength ( $P = 0.0004$ ). (c) Consumed nicotine was  
867 similar across three belief conditions ( $P = 0.178$ ), (d) cotinine concentration ( $P = 0.393$ ), or (e)  
868 CO level ( $P = 0.698$ ) did not differ between conditions. Bars depict group means and points  
869 represent participants. Error bars are SEM. \*\*\* $P < 0.001$ .

Perl et al.

Figure 2

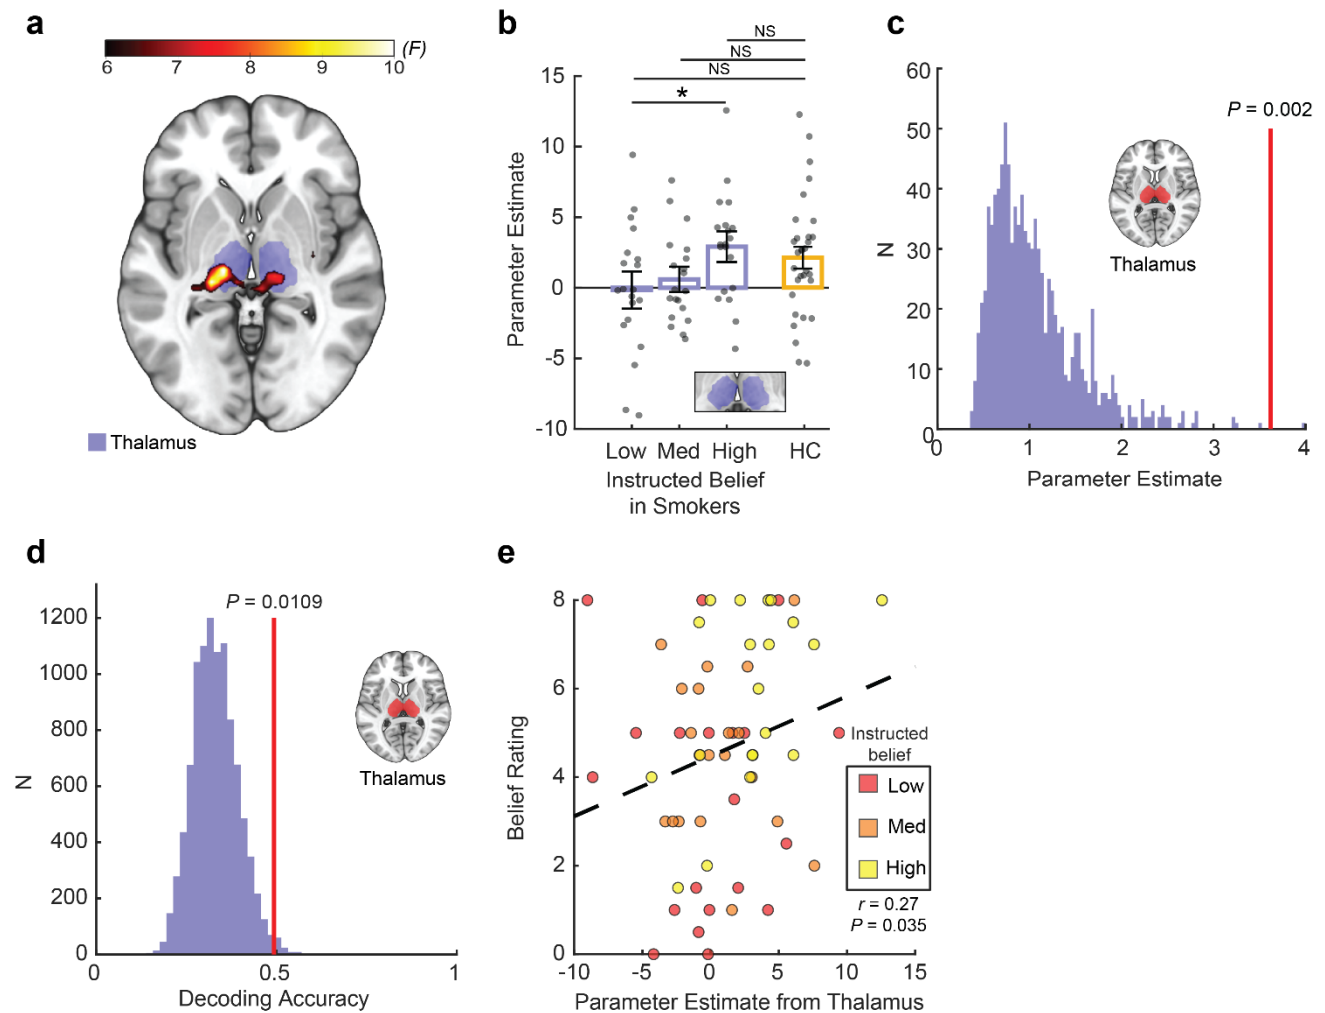

870

871 **Fig. 2. Belief about nicotine strength induced dose-dependent responses in the thalamus.**

872 (a) Whole-brain effects of instructed beliefs about nicotine on value-tracking signals  
 873 (rmANOVA, cluster-level  $P_{FWE} = 0.006$ ,  $k = 50$ ). (b) Parameter estimates representing reward-  
 874 related activities extracted from an independent thalamus mask (shown in purple) across belief  
 875 conditions in smokers ( $P = 0.036$ ), compared to a non-smoking healthy controls (HC, orange  
 876 bar) Bars depict group means, points represent participants. Error bars are SEM. \* $P < 0.05$ . (c)  
 877 Permutation analysis for instructed beliefs conditions ( $N = 1,000$ ,  $P = 0.002$ ). A histogram  
 878 comprised of surrogate distribution for beta estimates (black bars). Red line denotes mean of true  
 879 beta values. (d) Decoding accuracy of belief condition from thalamic neural patterns. Vertical  
 880 red line denotes decoding accuracy for ground truth data. Colored histogram is a surrogate  
 881 distribution comprised of decoding accuracy for the same neural data with shuffled labels. P  
 882 value is derived non-parametrically through a permutation test ( $N = 10,000$ ). (e) Correlation  
 883 between thalamic signals and subjective belief rating regarding perceived nicotine strength ( $r =$   
 884  $0.27$ ,  $P = 0.035$ ). Black dashed line is linear fit.



Perl et al.

885

Figure 3

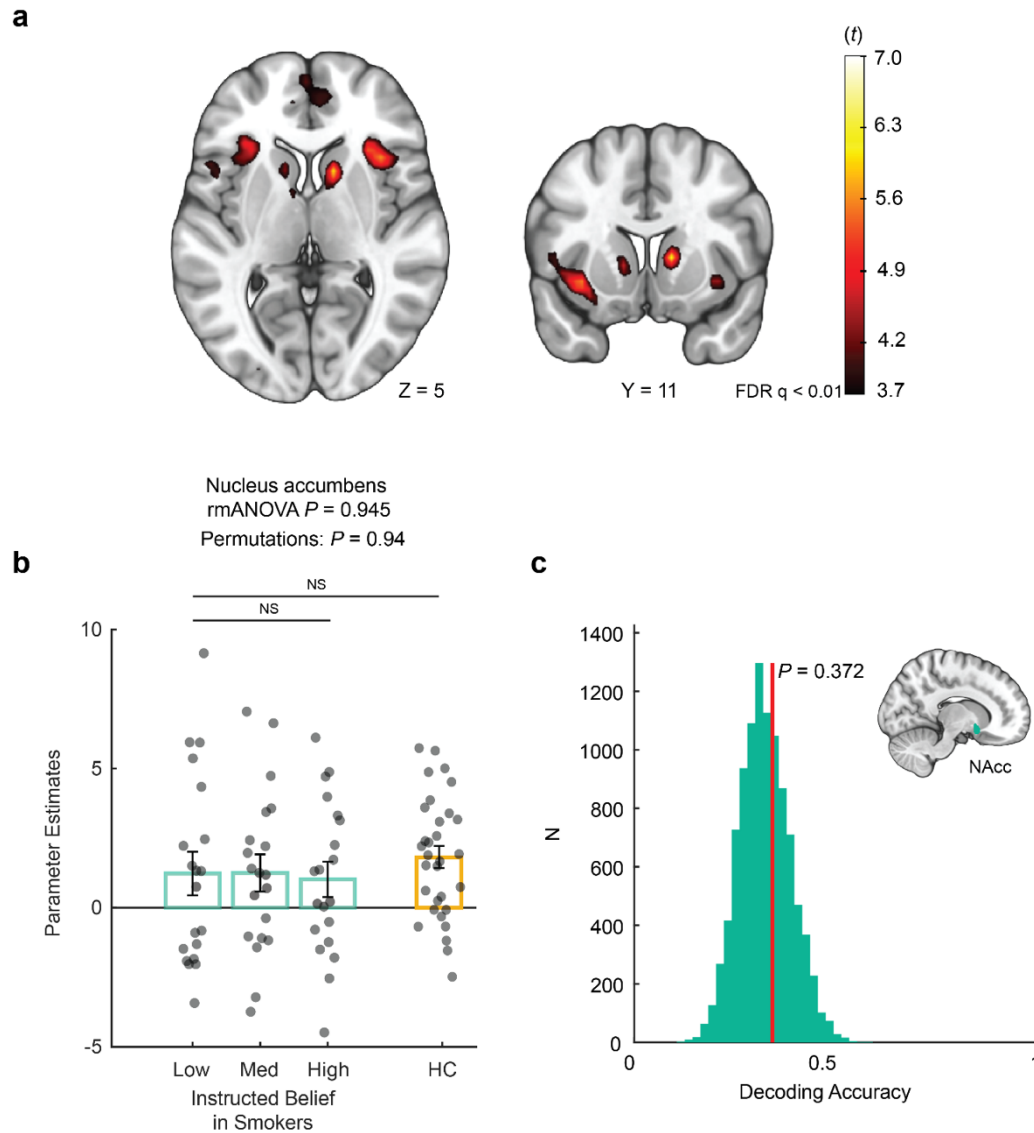

886

887 **Fig. 3. Belief about nicotine strength did not modulate striatal reward-related responses.**

888 (a) Whole-brain effects of cross-condition brain activation tracking market return across all

889 instructed belief conditions. Heatmap signifies  $t$  values. (b) Parameter estimates representing

890 reward-related activities extracted from an independent nucleus accumbens mask across belief

891 conditions in smokers (teal bars) (rmANOVA  $P = 0.945$ ; Permutations  $P = 0.94$ ), compared to a

892 non-smoking healthy controls (HC, orange bar). Bars depict group means, points represent

893 participants. Error bars are SEM. (c) Decoding accuracy of belief condition from accumbens

894 neural patterns. Vertical red line denotes decoding accuracy for ground truth data. Colored

895 histogram is a surrogate distribution comprised of decoding accuracy for the same neural data

896 with shuffled labels. P value is derived non-parametrically through a permutation test ( $N =$

897 10,000).



Perl et al.

898

Figure 4

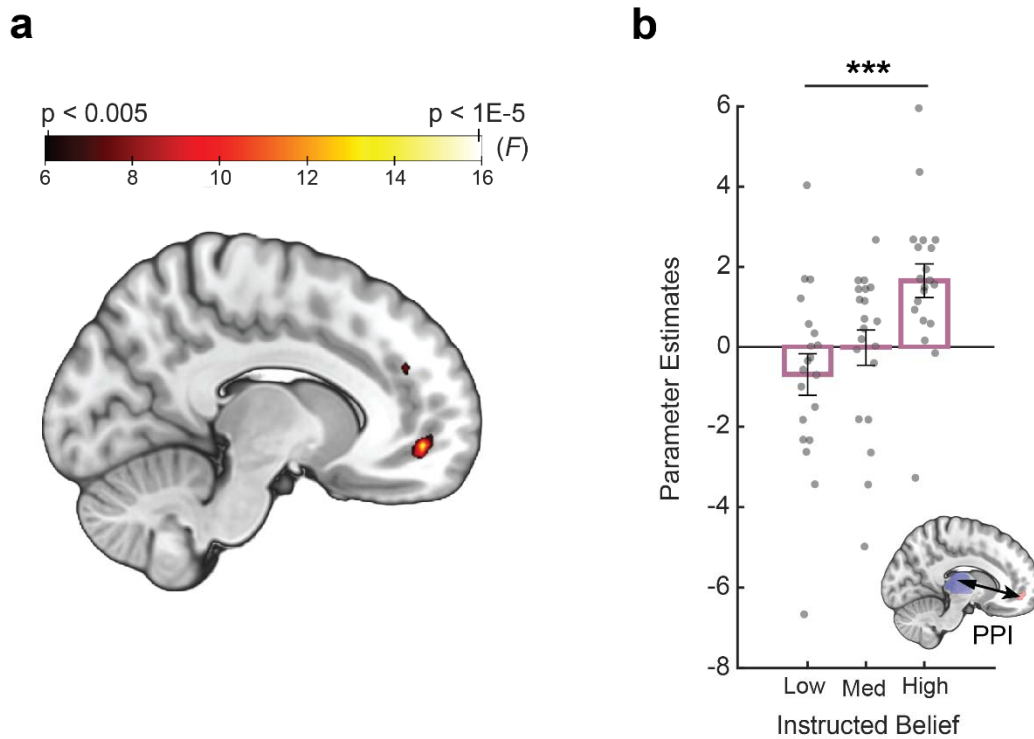

899

900 **Fig. 4. Belief about nicotine strength modulated thalamus-vmPFC functional connectivity**  
901 **in a dose-dependent fashion.** (a) Effects of instructed beliefs on the psychophysiological  
902 interaction (PPI) between the thalamus and the vmPFC. (b) Parameter estimates extracted from  
903 (a) representing functional coupling strength between the thalamus and vmPFC. Bars depict  
904 group means, points represent participants. Error bars are SEM.
